# Supplementary material for: Development of antibacterial peptides with efficient antibacterial activity, low toxicity, high membrane disruptive activity and a synergistic antibacterial effect
Source: Royal Society of Chemistry journal article supplement (doi:10.1039/d1tb02852a), 2022-01-01
Supplement: d1tb02852a1.pdf [file d1tb02852a1.pdf]

# Supplementary Information

## **Development of Antibacterial Peptides with Efficient Antibacterial Activity, Low Toxicity, High Membrane Disruptive Activity and the Synergistic Antibacterial Effect**

Hao Wang, Mingcong Niu, Tong Xue, Linhao Ma, Xiulian Gu, Guangcheng Wei, Fengqiao Li, Chunhua Wang\*

Department of Pharmacy Science, Binzhou Medical University, Yantai 264003, P. R. China.

Shandong Collaborative Innovation Center of Ocean Engineering Technology, Shandong Province, China.

\*Corresponding author E-mail: [chhuawang2020@126.com](mailto:chhuawang2020@126.com)

## 1. Fatty acids and phospholipid used in the preparation of lipopeptides

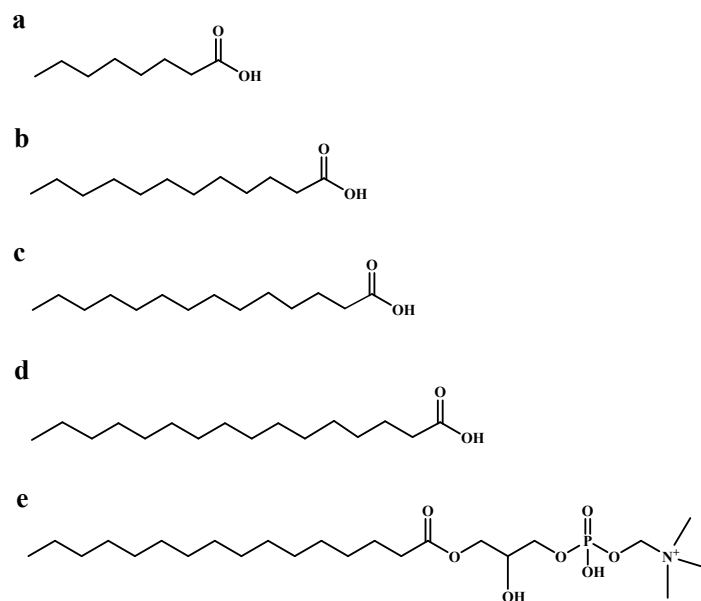

**Scheme S1.** Fatty acids and phospholipid for the preparation of lipopeptides. (a) N-octanoic acid; (b) Lauric acid; (c) Myristic acid; (d) Palmitic acid; (e) LPC.

## 2. Characterization of MS spectra

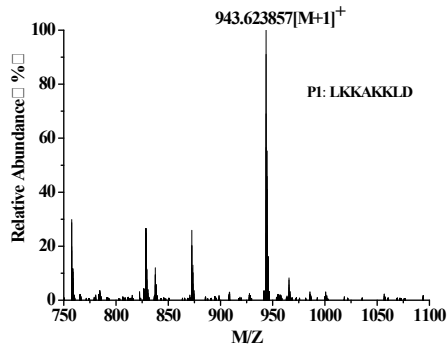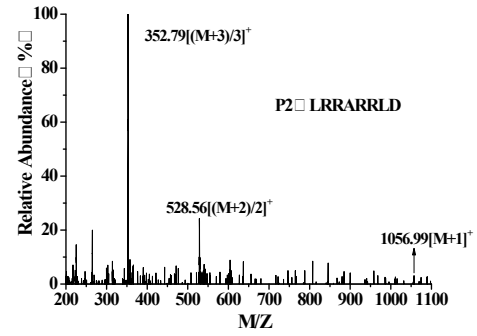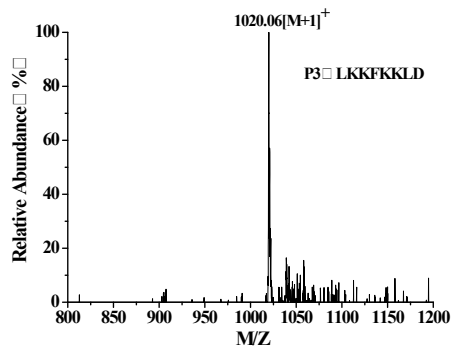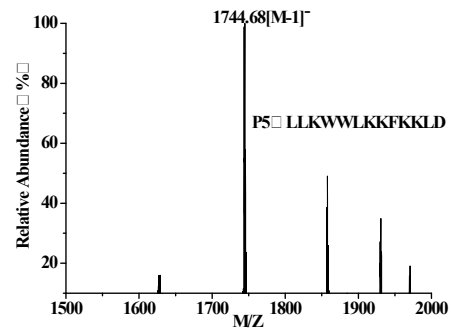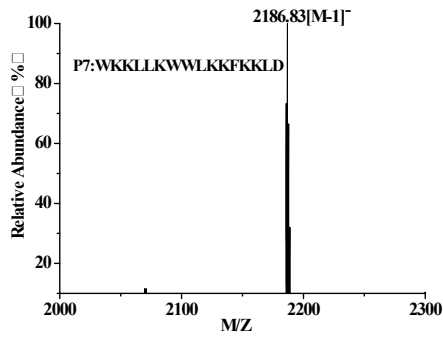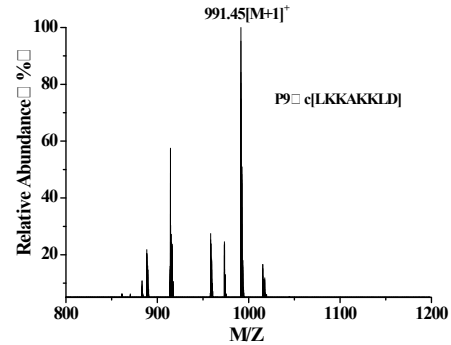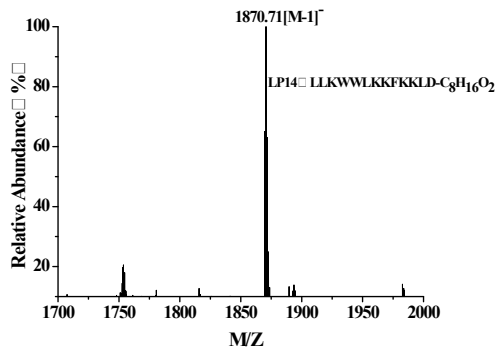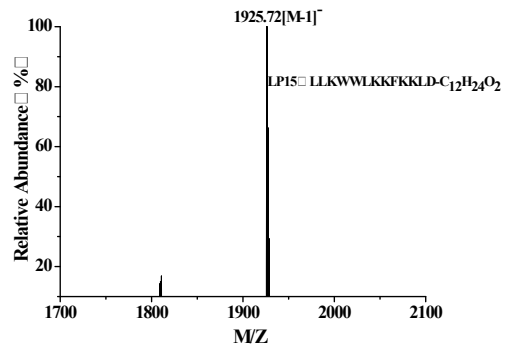

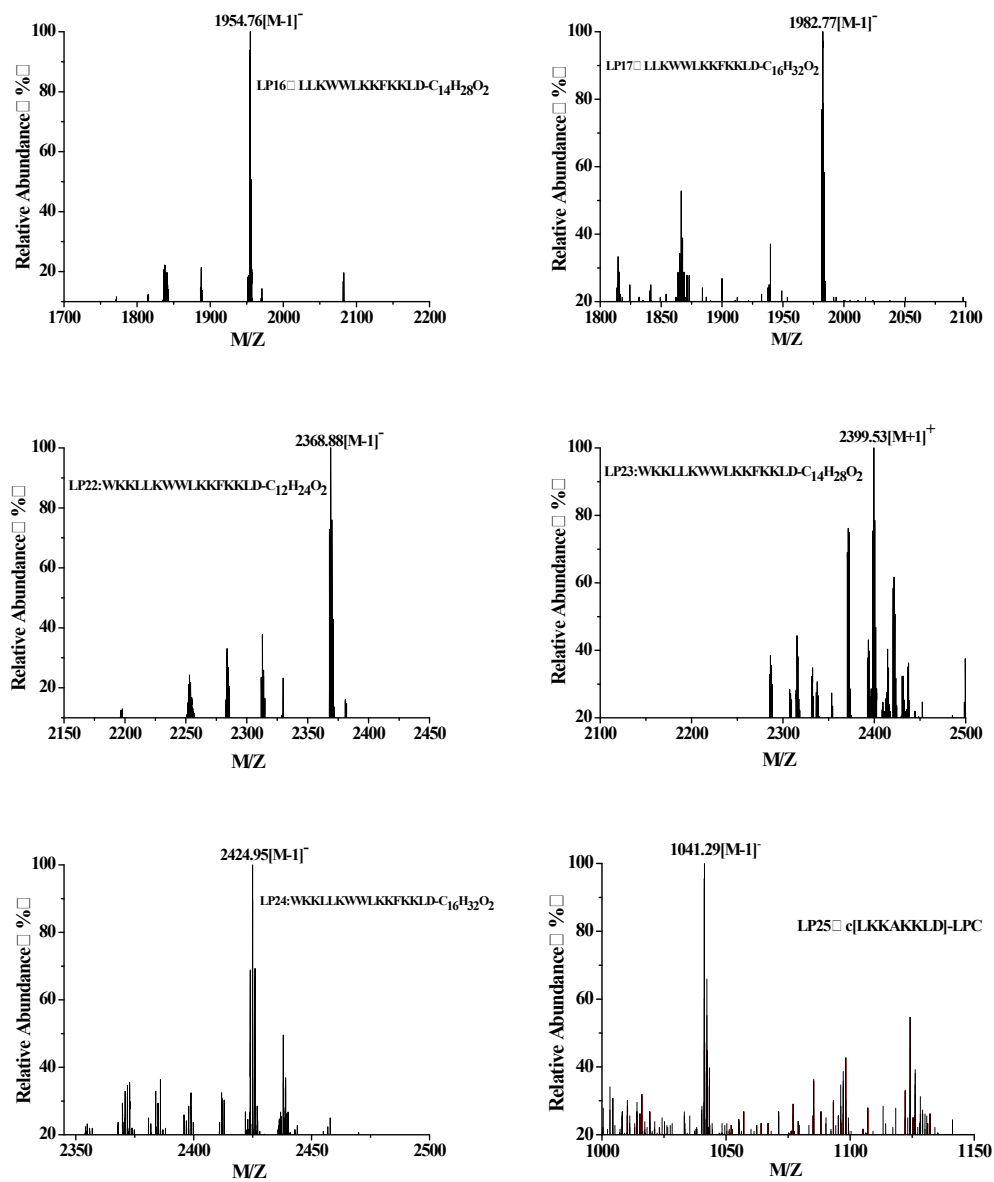

**Figure S1.** The MS spectra synthesized in the manuscript.

### 3. Fluorescence spectra of fluorescein and LP21-Fluorescein

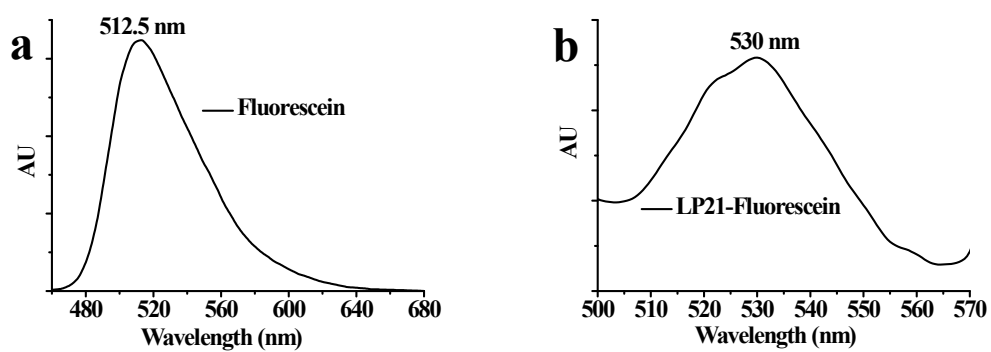

**Figure S2.** Fluorescence spectra of fluorescein and LP21-Fluorescein.

#### 4. CD spectra

**Table S1.** CD spectra in 180-260 nm with CDNN

| Secondary structure | P7 in water | P7 in SDS solution | LP21 in water | LP21 in SDS solution |
|---------------------|-------------|--------------------|---------------|----------------------|
| Helix               | 16.4%       | 18.6%              | 17.4%         | 60.6%                |
| Antiparallel        | 32.2%       | 44.8%              | 15.2%         | 1.9%                 |
| Parallel            | 1.7%        | 1.9%               | 1.7%          | 5.2%                 |
| Beta-Turn           | 23.5%       | 22.5%              | 36.1%         | 29.9%                |
| Rndm. Coil          | 31.1%       | 23.7%              | 37.1%         | 27.5%                |
| Total Sum           | 104.9%      | 111.7%             | 107.4%        | 125.2%               |

#### 5. Hemolysis

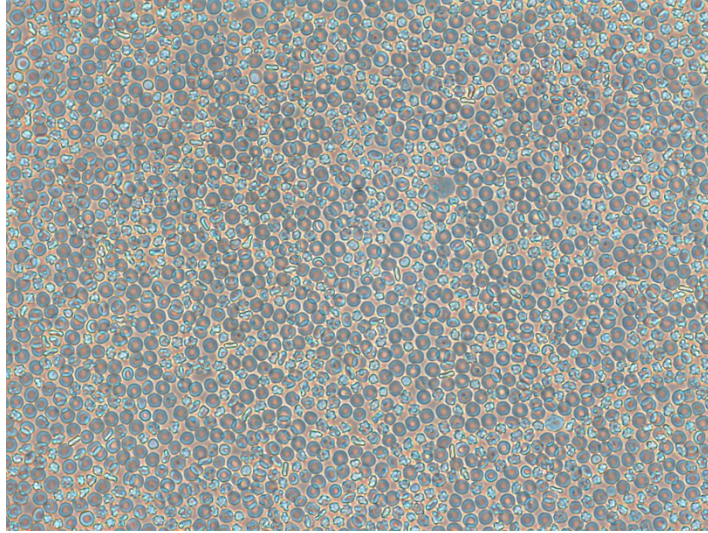

**Figure S3.** Hemolytic activity of LP21 (10 mg/kg) on mouse red blood cells (400×).

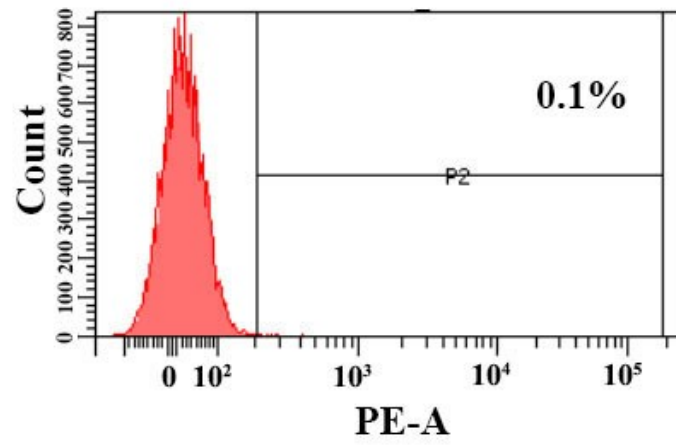

Figure S4. FCM of control group.
